# Supplementary material for: Discovery and characterization of functional modules associated with body weight in broilers
Source: PubMed Central journal article supplement (PMC6591351; doi:10.1038/s41598-019-45520-5), 2019-06-24
Supplement: 41598_2019_45520_MOESM2_ESM.pdf [file 41598_2019_45520_MOESM2_ESM.pdf]

# Discovery and characterization of functional modules associated with body weight in broilers

Eirini Tarsani<sup>1\*</sup>, Andreas Kranis<sup>2,3</sup>, Gerasimos Maniatis<sup>2</sup>, Santiago Avendano<sup>2</sup>, Ariadne L. Hager-Theodorides<sup>1</sup>, Antonios Kominakis<sup>1</sup>

<sup>1</sup>Department of Animal Science and Aquaculture, Agricultural University of Athens, Iera Odos 75, 11855, Athens, Greece

<sup>2</sup>Aviagen Ltd., Newbridge, Midlothian EH28 8SZ, UK

<sup>3</sup> The Roslin Institute, University of Edinburgh, EH25 9RG, Midlothian, United Kingdom

\*corresponding author: etarsani@aua.gr

Table S2: Published QTL/associations related to growth traits in the searched genomic regions. In bold are shown the QTL that included all candidate genes in the predefined distances.

| SNP ID            | GGA | Distance (bp) | Number of QTL | QTL (bp)*                       | QTL type                            | QTL IDs*     |
|-------------------|-----|---------------|---------------|---------------------------------|-------------------------------------|--------------|
| <i>rs13923872</i> | 1   | 613,054       | 20            | <b>37,278,942 - 128,288,555</b> | <b>Chest width</b>                  | <b>16706</b> |
|                   |     |               |               | <b>18,054,807 - 171,631,116</b> | <b>Visceral fat weight</b>          | <b>17319</b> |
|                   |     |               |               | <b>18,054,807 - 171,717,298</b> | <b>Total white fat weight</b>       | <b>17332</b> |
|                   |     |               |               | <b>25,724,479 - 171,631,116</b> | <b>Subcutaneous neck fat weight</b> | <b>17325</b> |

|  |  |  |  |                                      |                               |              |
|--|--|--|--|--------------------------------------|-------------------------------|--------------|
|  |  |  |  | <b>18,054,807 -<br/>196,202,543</b>  | <b>Body weight</b>            | <b>1797</b>  |
|  |  |  |  | <b>37,278,942 -<br/>133,528,161</b>  | <b>Body weight (140 days)</b> | <b>55919</b> |
|  |  |  |  | <b>18,054,807 -<br/>171,631,116</b>  | <b>Body weight (140 days)</b> | <b>17076</b> |
|  |  |  |  | <b>18,054,807 -<br/>171,631,116</b>  | <b>Carcass weight</b>         | <b>17110</b> |
|  |  |  |  | <b>100,051,042 -<br/>123,004,362</b> | <b>Breast muscle weight</b>   | <b>9410</b>  |
|  |  |  |  | <b>2,420,814 -<br/>171,631,116</b>   | <b>Shank length</b>           | <b>9409</b>  |
|  |  |  |  | <b>106,349,346 -<br/>123,007,835</b> | <b>Carcass fat content</b>    | <b>17119</b> |
|  |  |  |  | 113,159,926 -<br>128,288,555         | Shank weight                  | 14341        |
|  |  |  |  | 113,159,926 -<br>128,288,555         | Femur weight                  | 14342        |
|  |  |  |  | <b>18,054,807 -<br/>172,427,968</b>  | <b>Spleen weight</b>          | <b>1851</b>  |
|  |  |  |  | <b>18,054,807 -<br/>171,631,116</b>  | <b>Growth (70-105 days)</b>   | <b>55937</b> |
|  |  |  |  | <b>18,054,807 -<br/>168,151,247</b>  | <b>Abdominal fat weight</b>   | <b>6858</b>  |
|  |  |  |  | <b>18,054,807 -<br/>171,631,116</b>  | <b>Shank length</b>           | <b>9294</b>  |
|  |  |  |  | 113,159,926 -<br>115,848,566         | Breast muscle weight          | 13385        |
|  |  |  |  | <b>111,368,640 -<br/>164,599,096</b> | <b>Body weight (35 days)</b>  | <b>14355</b> |

|                    |   |         |    |                            |                                   |                        |
|--------------------|---|---------|----|----------------------------|-----------------------------------|------------------------|
|                    |   |         |    | 6,580,919 -<br>171,631,116 | Subcutaneous fat thickness        | 14359                  |
| <i>rs312691174</i> | 4 | 650,472 | 14 | 17,148,380 -<br>81,264,760 | Body weight (168 days)            | 24875                  |
|                    |   |         |    | 17,148,380 -<br>81,264,760 | Body weight (21 days)             | 24842                  |
|                    |   |         |    | 17,148,380 -<br>81,264,760 | Body weight (336 days)            | 24883                  |
|                    |   |         |    | 17,148,380 -<br>81,264,760 | Body weight (42 days)             | 24855                  |
|                    |   |         |    | 17,148,380 -<br>81,264,760 | Average daily gain                | 24899, 24905, 24911    |
|                    |   |         |    | 17,148,380 -<br>81,264,760 | Body weight (84 days)             | 24866                  |
|                    |   |         |    | 17,148,380 -<br>81,264,760 | Body weight (504 days)            | 24890                  |
|                    |   |         |    | 4,964,691 -<br>87,025,255  | Visceral fat weight               | 17321                  |
|                    |   |         |    | 10,768,639 -<br>91,268,419 | Average daily gain                | 24914                  |
|                    |   |         |    | 18,357,474 -<br>31,942,137 | Shank length                      | 9295                   |
|                    |   |         |    | 18,354,191 -<br>37,883,325 | Thigh muscle weight               | 9395                   |
|                    |   |         |    | 18,354,191 -<br>47,647,218 | Drumstick and thigh muscle weight | 13404                  |
|                    |   |         |    | 17,148,380 -<br>81,264,760 | Body weight (day of first egg)    | 14457, 14464,<br>14470 |
|                    |   |         |    | 17,148,380 -<br>81,264,760 | Head percentage                   | 15571                  |
| <i>rs15608447</i>  | 4 | 718,407 | 36 | 67,546,750 -<br>67,546,790 | Body weight (28 days)             | 65710                  |

|  |  |  |  |                            |                          |                        |
|--|--|--|--|----------------------------|--------------------------|------------------------|
|  |  |  |  | 17,148,380 -<br>81,264,760 | Body weight (168 days)   | 24875                  |
|  |  |  |  | 47,647,218 -<br>89,464,128 | Body weight              | 200.820.152.016        |
|  |  |  |  | 17,148,380 -<br>81,264,760 | Body weight (21 days)    | 24842                  |
|  |  |  |  | 17,148,380 -<br>81,264,760 | Body weight (336 days)   | 24883                  |
|  |  |  |  | 47,647,218 -<br>89,464,128 | Carcass weight           | 2012                   |
|  |  |  |  | 17,148,380 -<br>81,264,760 | Body weight (42 days)    | 24855                  |
|  |  |  |  | 17,148,380 -<br>81,264,760 | Average daily gain       | 24899, 24905,<br>24911 |
|  |  |  |  | 17,148,380 -<br>81,264,760 | Body weight (84 days)    | 24866                  |
|  |  |  |  | 47,647,218 -<br>89,464,128 | Liver weight             | 2017                   |
|  |  |  |  | 52,604,411 -<br>82,619,142 | Growth (14-28 days)      | 12499                  |
|  |  |  |  | 17,148,380 -<br>81,264,760 | Body weight (504 days)   | 24890                  |
|  |  |  |  | 48,804,413 -<br>85,154,534 | Growth (28-42 days)      | 12500                  |
|  |  |  |  | 52,191,247 -<br>89,464,128 | Abdominal fat percentage | 9421                   |
|  |  |  |  | 48,404,949 -<br>82,619,142 | Growth (0-14 days)       | 12498                  |
|  |  |  |  | 52,535,768 -<br>70,787,114 | Shank length             | 9286                   |
|  |  |  |  | 49,665,708 -<br>85,877,678 | Total white fat weight   | 17334                  |

|  |  |  |  |                                    |                                |              |
|--|--|--|--|------------------------------------|--------------------------------|--------------|
|  |  |  |  | <b>30,906,204 -<br/>83,247,658</b> | <b>Tibia width</b>             | <b>2035</b>  |
|  |  |  |  | <b>61,970,484 -<br/>83,247,658</b> | <b>Tibia width</b>             | <b>2038</b>  |
|  |  |  |  | <b>62,452,715 -<br/>89,022,456</b> | <b>Growth (42-56 days)</b>     | <b>12501</b> |
|  |  |  |  | <b>4,964,691 -<br/>87,025,255</b>  | <b>Visceral fat weight</b>     | <b>17321</b> |
|  |  |  |  | <b>62,331,035 -<br/>82,550,230</b> | <b>Pectoralis major weight</b> | <b>2041</b>  |
|  |  |  |  | <b>31,561,525 -<br/>89,318,267</b> | <b>Body weight (35 days)</b>   | <b>55905</b> |
|  |  |  |  | <b>32,974,594 -<br/>89,318,267</b> | <b>Growth (0-35 days)</b>      | <b>55930</b> |
|  |  |  |  | <b>47,647,218 -<br/>89,464,128</b> | <b>Drumstick muscle weight</b> | <b>2057</b>  |
|  |  |  |  | <b>10,768,639 -<br/>91,268,419</b> | <b>Average daily gain</b>      | <b>24914</b> |
|  |  |  |  | <b>47,647,218 -<br/>89,464,128</b> | <b>Drumstick weight</b>        | <b>2059</b>  |
|  |  |  |  | <b>47,647,218 -<br/>89,464,128</b> | <b>Wing weight</b>             | <b>2060</b>  |
|  |  |  |  | <b>47,647,218 -<br/>89,464,128</b> | <b>Body weight (42 days)</b>   | <b>9759</b>  |
|  |  |  |  | <b>47,647,218 -<br/>89,464,128</b> | <b>Body weight (63 days)</b>   | <b>9760</b>  |
|  |  |  |  | <b>47,647,218 -<br/>89,464,128</b> | <b>Growth (21-42 days)</b>     | <b>9761</b>  |
|  |  |  |  | <b>47,647,218 -<br/>89,464,128</b> | <b>Growth (42-63 days)</b>     | <b>9762</b>  |
|  |  |  |  | <b>62,331,035 -<br/>82,299,229</b> | <b>Shank length</b>            | <b>11795</b> |

|                    |    |         |    |                                |                                          |                            |
|--------------------|----|---------|----|--------------------------------|------------------------------------------|----------------------------|
|                    |    |         |    | <b>47,647,218 - 89,464,128</b> | <b>Skin fat weight</b>                   | <b>12636</b>               |
|                    |    |         |    | <b>47,647,218 - 89,464,128</b> | <b>Drumstick and thigh muscle weight</b> | <b>13395</b>               |
|                    |    |         |    | <b>17,148,380 - 81,264,760</b> | <b>Body weight (day of first egg)</b>    | <b>14457, 14464, 14470</b> |
| <i>rs318199727</i> | 10 | 737,906 | 11 | 13,330,009 - 13,330,034        | Dressing percentage                      | 57550                      |
|                    |    |         |    | 13,330,009 - 13,330,034        | Breast muscle percentage                 | 57551                      |
|                    |    |         |    | 13,329,989 - 13,330,029        | Breast muscle percentage                 | 57547                      |
|                    |    |         |    | 13,329,989 - 13,330,029        | Drumstick and thigh muscle percentage    | 57548                      |
|                    |    |         |    | 13,329,989 - 13,330,029        | Abdominal fat percentage                 | 57549                      |
|                    |    |         |    | <b>692,555 -20,423,025</b>     | <b>Carcass weight</b>                    | <b>17113</b>               |
|                    |    |         |    | <b>1,541,735 - 16,171,711</b>  | <b>Body weight (140 days)</b>            | <b>55923</b>               |
|                    |    |         |    | <b>2,357,400 - 17,864,188</b>  | <b>Body weight (35 days)</b>             | <b>55907</b>               |
|                    |    |         |    | <b>692,555 -20,423,025</b>     | <b>Body weight (70 days)</b>             | <b>55911</b>               |
|                    |    |         |    | <b>2,552,841 - 18,059,263</b>  | <b>Growth (0-35 days)</b>                | <b>55931</b>               |
|                    |    |         |    | <b>4,410,690 - 18,434,155</b>  | <b>Body weight (105 days)</b>            | <b>55917</b>               |
| <i>rs318098582</i> | 11 | 300,257 | 9  | <b>1,133,281 - 19,983,730</b>  | <b>Body weight (140 days)</b>            | <b>55924</b>               |
|                    |    |         |    | <b>18,193,544 - 20,208,550</b> | <b>Thigh meat-to-bone ratio</b>          | <b>6736</b>                |

|                    |    |         |    |                                |                                     |              |
|--------------------|----|---------|----|--------------------------------|-------------------------------------|--------------|
|                    |    |         |    | <b>18,193,544 - 20,208,550</b> | <b>Body weight (40 days)</b>        | <b>6737</b>  |
|                    |    |         |    | <b>953,174 -20,208,550</b>     | <b>Body weight (140 days)</b>       | <b>17080</b> |
|                    |    |         |    | <b>6,823,128 - 20,208,550</b>  | <b>Carcass weight</b>               | <b>17114</b> |
|                    |    |         |    | <b>12,510,855 - 20,208,550</b> | <b>Carcass weight</b>               | <b>17088</b> |
|                    |    |         |    | <b>6,910,612 - 20,208,550</b>  | <b>Spleen weight</b>                | <b>2287</b>  |
|                    |    |         |    | 18,193,544 - 18,870,770        | Body weight                         | 2284, 2285   |
|                    |    |         |    | 18,642,683 - 18,686,657        | Growth (8-46 days)                  | 9519         |
| <i>rs317945754</i> | 15 | 935,183 | 21 | 3,731,712 -3,769,767           | Spleen weight                       | 2349         |
|                    |    |         |    | 3,731,712 -3,769,767           | Body weight (42 days)               | 9727         |
|                    |    |         |    | 3,731,712 -3,769,767           | Carcass weight                      | 9728         |
|                    |    |         |    | 3,731,712 -3,769,767           | Spleen percentage                   | 12588        |
|                    |    |         |    | 2,812,987 - 10,689,472         | Body weight (336 days)              | 24887        |
|                    |    |         |    | 4,236,686 -4,265,310           | Abdominal fat weight                | 11995        |
|                    |    |         |    | <b>1,931,502 -7,215,657</b>    | <b>Visceral fat weight</b>          | <b>17323</b> |
|                    |    |         |    | <b>2,519,182 -7,215,657</b>    | <b>Subcutaneous neck fat weight</b> | <b>17331</b> |
|                    |    |         |    | 3,749,008 -7,973,093           | Drumstick and thigh percentage      | 15586        |
|                    |    |         |    | 3,749,008 -7,973,093           | Abdominal fat weight                | 2337         |
|                    |    |         |    | 3,749,008 -7,973,093           | Abdominal fat percentage            | 2339, 2340   |
|                    |    |         |    | 3,749,008 -8,228,905           | Body weight (35 days)               | 3355         |
|                    |    |         |    | <b>1,931,502 -7,215,657</b>    | <b>Total white fat weight</b>       | <b>17337</b> |
|                    |    |         |    | 2,812,987 - 10,689,472         | Liver weight                        | 2348         |

|                    |    |         |   |                                                                                                                                       |                                 |             |
|--------------------|----|---------|---|---------------------------------------------------------------------------------------------------------------------------------------|---------------------------------|-------------|
|                    |    |         |   | <b>2,403,639 - 10,689,472</b>                                                                                                         | <b>Abdominal fat percentage</b> | <b>9450</b> |
|                    |    |         |   | <b>1,931,502 - 10,689,472</b>                                                                                                         | <b>Abdominal fat weight</b>     | <b>9451</b> |
|                    |    |         |   | 2,812,987 - 10,689,472                                                                                                                | Abdominal fat weight            | 2347, 12631 |
|                    |    |         |   | 3,749,008 - 10,689,472                                                                                                                | Body weight (46 days)           | 6648        |
|                    |    |         |   | 3,749,008 - 10,689,472                                                                                                                | Growth (8-46 days)              | 6649        |
|                    |    |         |   | 2,812,987 - 10,689,472                                                                                                                | Fat distribution                | 12645       |
|                    |    |         |   | <b>1,931,502 -9,638,429</b>                                                                                                           | <b>Breast muscle weight</b>     | <b>9449</b> |
| <i>rs316794400</i> | 22 | 26,589  | 1 | QTL: 3,625,173-4,599,266 bp could not be remapped from Gallus gallus 4 to Gallus gallus 5.0 assembly by NCBI Genome Remapping Service | Breast muscle percentage        | 95429       |
| <i>rs317627533</i> | 26 | 773,988 | 6 | 3,118,976 -4,116,802                                                                                                                  | Body weight (28 days)           | 95418       |
|                    |    |         |   | 1,263,919 -4,918,464                                                                                                                  | Body weight (63 days)           | 9453        |
|                    |    |         |   | 2,499,704 -4,918,464                                                                                                                  | Shank weight                    | 2383        |
|                    |    |         |   | 4,610,791 -4,624,276                                                                                                                  | Liver percentage                | 2385        |



|                    |    |         |    |                                                                                                                                         |                       |                     |
|--------------------|----|---------|----|-----------------------------------------------------------------------------------------------------------------------------------------|-----------------------|---------------------|
|                    |    |         |    | QTL: 4,715,796-108,192,374 bp could not be remapped from Gallus gallus 4 to Gallus gallus 5.0 assembly by NCBI Genome Remapping Service | Abdominal fat weight  | 30883               |
|                    |    |         |    | 4,873,346 -4,886,832                                                                                                                    | Breast muscle weight  | 6957                |
| <i>rs314452928</i> | 27 | 140,067 | 3  | QTL: 81,131-81,301 bp could not be remapped from Gallus gallus 4 to Gallus gallus 5.0 assembly by NCBI Genome Remapping Service         | Growth (105-140 days) | 55944               |
|                    |    |         |    | 54,597 -4,520,058                                                                                                                       | Growth (0-35 days)    | 55932               |
|                    |    |         |    | 54,597 -4,520,058                                                                                                                       | Body weight (35 days) | 55906               |
| <i>rs315329074</i> | 27 | 998,553 | 65 | 3,834,510 -3,834,550                                                                                                                    | Shank length          | 66068, 66069, 66070 |
|                    |    |         |    | 3,363,708 -3,363,748                                                                                                                    | Shank length          | 66067               |
|                    |    |         |    | 3,971,422 -3,971,462                                                                                                                    | Shank circumference   | 66063               |
|                    |    |         |    | 3,564,173 -3,564,213                                                                                                                    | Shank circumference   | 66065               |
|                    |    |         |    | 3,624,903 -3,624,943                                                                                                                    | Shank circumference   | 66064, 66066        |
|                    |    |         |    | 3,869,461 -3,869,501                                                                                                                    | Shank length          | 66071               |
|                    |    |         |    | 3,456,748 -3,456,788                                                                                                                    | Abdominal fat weight  | 66072               |
|                    |    |         |    | 1,798,380 -3,707,375                                                                                                                    | Abdominal fat weight  | 11817, 11809        |

|  |  |  |                      |                                           |                     |
|--|--|--|----------------------|-------------------------------------------|---------------------|
|  |  |  | 1,798,380 -3,707,375 | Abdominal fat percentage                  | 11820               |
|  |  |  | 1,798,380 -3,707,375 | Carcass fat content                       | 17135, 17126        |
|  |  |  | 1,798,380 -3,707,375 | Head percentage                           | 15599               |
|  |  |  | 1,798,380 -3,707,375 | Body weight                               | 2406, 2407          |
|  |  |  | 1,798,380 -3,707,375 | Body weight (1 day)                       | 7178                |
|  |  |  | 1,798,380 -3,707,375 | Body weight (41 days)                     | 7186                |
|  |  |  | 1,365,641 -4,520,058 | Humerus length                            | 2397                |
|  |  |  | 3,522,988 -3,534,446 | Body weight (112 days)                    | 9521                |
|  |  |  | 3,522,988 -3,534,446 | Body weight (200 days)                    | 9522                |
|  |  |  | 3,522,988 -3,534,446 | Growth (46-112 days)                      | 9523                |
|  |  |  | 1,365,641 -4,520,058 | Body weight                               | 2410                |
|  |  |  | 1,809,980 -3,707,375 | Body weight (35 days)                     | 3356                |
|  |  |  | 1,809,980 -3,707,375 | Abdominal fat percentage                  | 3354                |
|  |  |  | 1,798,380 -3,707,375 | Carcass protein content, dry matter basis | 17124               |
|  |  |  | 1,798,380 -3,707,375 | Carcass fat content, dry matter basis     | 17125               |
|  |  |  | 3,701,574 -3,713,173 | Body weight (42 days)                     | 9775                |
|  |  |  | 3,701,574 -3,713,173 | Growth (21-42 days)                       | 9776                |
|  |  |  | 3,701,574 -3,713,173 | Body weight (day of first egg)            | 14459, 14466, 14473 |
|  |  |  | 3,701,574 -3,713,173 | Body weight (168 days)                    | 24878               |
|  |  |  | 3,701,574 -3,713,173 | Body weight (336 days)                    | 24888               |
|  |  |  | 3,701,574 -3,713,173 | Body weight (504 days)                    | 24892               |
|  |  |  | 3,701,574 -3,713,173 | Average daily gain                        | 24907               |
|  |  |  | 3,707,375 -3,968,049 | Body weight                               | 2404, 2405          |

|  |  |  |                      |                                |       |
|--|--|--|----------------------|--------------------------------|-------|
|  |  |  | 3,707,375 -4,520,058 | Thigh weight                   | 2411  |
|  |  |  | 3,707,375 -4,520,058 | Wing weight                    | 2412  |
|  |  |  | 3,788,374 -3,889,766 | Drumstick and thigh weight     | 11920 |
|  |  |  | 3,788,374 -3,889,766 | Drumstick and thigh percentage | 11921 |
|  |  |  | 3,788,374 -3,889,766 | Abdominal fat percentage       | 11934 |
|  |  |  | 3,788,374 -3,889,766 | Pectoralis major percent       | 11950 |
|  |  |  | 3,204,318 -4,520,058 | Shank weight                   | 2413  |
|  |  |  | 1,798,380 -3,707,375 | Body weight (112 days)         | 6652  |
|  |  |  | 1,798,380 -3,707,375 | Body weight (200 days)         | 6653  |
|  |  |  | 1,798,380 -3,707,375 | Growth (46-112 days)           | 6654  |
|  |  |  | 1,798,380 -3,379,175 | Femur length                   | 6778  |
|  |  |  | 1,798,380 -3,707,375 | Shank weight percentage        | 15567 |
|  |  |  | 2,263,107 -4,520,058 | Carcass weight                 | 17116 |
|  |  |  | 404,762 -4,520,058   | Wing weight                    | 17109 |
|  |  |  | 2,780,009 -4,520,058 | Body weight (105 days)         | 55918 |
|  |  |  | 54,597 -4,520,058    | Growth (0-35 days)             | 55932 |
|  |  |  | 1,365,641 -4,520,058 | Body weight                    | 2409  |
|  |  |  | 54,597 -4,520,058    | Body weight (35 days)          | 55906 |
|  |  |  | 2,454,458 -4,520,058 | Body weight (140 days)         | 55926 |
|  |  |  | 2,639,460 -4,520,058 | Body weight (70 days)          | 55912 |
|  |  |  | 3,707,375 -4,520,058 | Body weight (35 days)          | 7159  |
|  |  |  | 1,850,810 -4,520,058 | Carcass weight                 | 17090 |
|  |  |  | 2,639,460 -4,520,058 | Growth (35-70 days)            | 55936 |
|  |  |  | 4,377,710 -4,389,305 | Shank length                   | 9288  |

|                                                                                                                                                                                                                           |  |  |  |                             |                            |              |
|---------------------------------------------------------------------------------------------------------------------------------------------------------------------------------------------------------------------------|--|--|--|-----------------------------|----------------------------|--------------|
|                                                                                                                                                                                                                           |  |  |  | 3,707,375 -4,520,058        | Shank weight percentage    | 15595        |
|                                                                                                                                                                                                                           |  |  |  | 2,390,652 -4,520,058        | Breast muscle weight       | 17096        |
|                                                                                                                                                                                                                           |  |  |  | 3,597,175 -4,520,058        | Drumstick and thigh weight | 17105        |
|                                                                                                                                                                                                                           |  |  |  | 3,707,375 -4,520,058        | Intramuscular fat          | 3360         |
|                                                                                                                                                                                                                           |  |  |  | 2,141,304 -4,520,058        | Body weight (140 days)     | 17084        |
|                                                                                                                                                                                                                           |  |  |  | 3,707,375 -4,520,058        | Body weight                | 2408         |
|                                                                                                                                                                                                                           |  |  |  | <b>3,788,374 -5,629,582</b> | <b>Thigh percentage</b>    | <b>30886</b> |
|                                                                                                                                                                                                                           |  |  |  | 5,159,872 -5,171,472        | Body weight (56 days)      | 12395        |
|                                                                                                                                                                                                                           |  |  |  | 5,159,872 -5,171,472        | Body weight (hatch)        | 16623        |
|                                                                                                                                                                                                                           |  |  |  | 5,159,872 -5,171,472        | Body weight (300 days)     | 16624        |
| <p>*Note: The positions of QTL were remapped to Gallus_gallus-5.0 genome assembly using NCBI database (<a href="https://www.ncbi.nlm.nih.gov/genome/tools/remap">https://www.ncbi.nlm.nih.gov/genome/tools/remap</a>)</p> |  |  |  |                             |                            |              |
