# Supplementary material for: Discovery and characterization of functional modules associated with body weight in broilers
Source: PubMed Central journal article supplement (PMC6591351; doi:10.1038/s41598-019-45520-5), 2019-06-24
Supplement: 41598_2019_45520_MOESM3_ESM.pdf [file 41598_2019_45520_MOESM3_ESM.pdf]

# Discovery and characterization of functional modules associated with body weight in broilers

Eirini Tarsani<sup>1\*</sup>, Andreas Kranis<sup>2,3</sup>, Gerasimos Maniatis<sup>2</sup>, Santiago Avendano<sup>2</sup>,  
Ariadne L. Hager-Theodorides<sup>1</sup>, Antonios Kominakis<sup>1</sup>

<sup>1</sup>Department of Animal Science and Aquaculture, Agricultural University of Athens, Iera Odos 75, 11855, Athens, Greece

<sup>2</sup>Aviagen Ltd., Newbridge, Midlothian EH28 8SZ, UK

<sup>3</sup> The Roslin Institute, University of Edinburgh, EH25 9RG, Midlothian, United Kingdom

\*corresponding author: [etarsani@aua.gr](mailto:etarsani@aua.gr)

Table S3: Genes and chromosomes per module.

| Module ID | GGA | Gene ID         |
|-----------|-----|-----------------|
| module1   | 4   | <i>NIPAL1</i>   |
| module2   | 27  | <i>GPR179</i>   |
| module2   | 4   | <i>ZAR1</i>     |
| module2   | 4   | <i>PCDH18</i>   |
| module2   | 26  | <i>DENND2C</i>  |
| module2   | 4   | <i>LRRC66</i>   |
| module2   | 25  | <i>NES</i>      |
| module2   | 10  | <i>TICRR</i>    |
| module2   | 11  | <i>CIDEC</i>    |
| module2   | 4   | <i>NOCT</i>     |
| module2   | 27  | <i>ARHGAP23</i> |
| module2   | 26  | <i>OPTC</i>     |
| module2   | 27  | <i>KRT222</i>   |
| module2   | 4   | <i>GABRA4</i>   |
| module2   | 26  | <i>IP6K3</i>    |
| module2   | 25  | <i>LIM2</i>     |
| module2   | 15  | <i>ADGRD1</i>   |

|         |    |                 |
|---------|----|-----------------|
| module2 | 15 | <i>TMEM132C</i> |
| module2 | 10 | <i>RHCG</i>     |
| module2 | 25 | <i>BCAN</i>     |
| module2 | 26 | <i>PIFO</i>     |
| module2 | 27 | <i>LRRC46</i>   |
| module2 | 4  | <i>GABRG1</i>   |
| module2 | 27 | <i>KLHL10</i>   |
| module2 | 27 | <i>LRRC3C</i>   |
| module2 | 27 | <i>TNS4</i>     |
| module2 | 27 | <i>RAPGEFL1</i> |
| module2 | 4  | <i>MGARP</i>    |
| module2 | 26 | <i>PACSIN1</i>  |
| module2 | 15 | <i>PIWIL1</i>   |
| module2 | 15 | <i>TMEM132D</i> |
| module2 | 27 | <i>HOXB8</i>    |
| module2 | 26 | <i>TCP11</i>    |
| module2 | 26 | <i>FRS3</i>     |
| module2 | 27 | <i>HOXB4</i>    |
| module2 | 27 | <i>GNGT2</i>    |
| module2 | 25 | <i>SLAMF8</i>   |
| module2 | 27 | <i>FKBP10</i>   |
| module2 | 27 | <i>GSDMA</i>    |
| module2 | 4  | <i>CORIN</i>    |
| module2 | 26 | <i>CHIA</i>     |
| module2 | 25 | <i>TMEM79</i>   |
| module2 | 4  | <i>SPATA18</i>  |
| module2 | 27 | <i>KCNH4</i>    |
| module2 | 27 | <i>HOXB9</i>    |
| module2 | 26 | <i>SCUBE3</i>   |
| module2 | 25 | <i>RHBG</i>     |
| module2 | 4  | <i>RASL11B</i>  |
| module2 | 11 | <i>SLC22A31</i> |
| module2 | 26 | <i>SYT6</i>     |
| module2 | 25 | <i>INSRR</i>    |
| module2 | 25 | <i>S100A14</i>  |
| module2 | 4  | <i>CWH43</i>    |
| module2 | 4  | <i>SLC10A4</i>  |
| module2 | 26 | <i>USP49</i>    |
| module2 | 27 | <i>CCR10</i>    |
| module2 | 11 | <i>ZFPM1</i>    |
| module2 | 25 | <i>HAPLN2</i>   |
| module2 | 1  | <i>SYTL5</i>    |
| module2 | 25 | <i>S100A16</i>  |
| module2 | 11 | <i>IL17C</i>    |

|         |    |                 |
|---------|----|-----------------|
| module2 | 15 | <i>TMEM132B</i> |
| module2 | 11 | <i>ZNF469</i>   |
| module2 | 27 | <i>TTC25</i>    |
| module2 | 27 | <i>ZPBP2</i>    |
| module2 | 25 | <i>LRRC71</i>   |
| module2 | 25 | <i>PEAR1</i>    |
| module2 | 27 | <i>GJD3</i>     |
| module2 | 25 | <i>DCST2</i>    |
| module2 | 27 | <i>TBKBP1</i>   |
| module2 | 27 | <i>HCRT</i>     |
| module2 | 1  | <i>SRPX</i>     |
| module2 | 27 | <i>G6PC</i>     |
| module2 | 10 | <i>SV2B</i>     |
| module2 | 27 | <i>THRA</i>     |
| module2 | 10 | <i>PLIN1</i>    |
| module2 | 25 | <i>SV2A</i>     |
| module2 | 26 | <i>TSPO2</i>    |
| module2 | 25 | <i>SLAMF1</i>   |
| module2 | 26 | <i>GRM4</i>     |
| module2 | 26 | <i>PRELP</i>    |
| module2 | 27 | <i>MEOX1</i>    |
| module2 | 10 | <i>MFGE8</i>    |
| module2 | 1  | <i>PRRG1</i>    |
| module2 | 26 | <i>SPDEF</i>    |
| module2 | 1  | <i>XK</i>       |
| module2 | 26 | <i>SYCP1</i>    |
| module2 | 26 | <i>MKRN3</i>    |
| module2 | 27 | <i>RAMP2</i>    |
| module2 | 15 | <i>STX2</i>     |
| module2 | 4  | <i>TEC</i>      |
| module2 | 27 | <i>HOXB6</i>    |
| module2 | 27 | <i>HAP1</i>     |
| module2 | 11 | <i>CBFA2T3</i>  |
| module2 | 27 | <i>NEUROD2</i>  |
| module2 | 15 | <i>FZD10</i>    |
| module2 | 4  | <i>GABRB1</i>   |
| module2 | 26 | <i>MLN</i>      |
| module2 | 27 | <i>HOXB2</i>    |
| module2 | 26 | <i>MDF1</i>     |
| module2 | 26 | <i>FMOD</i>     |
| module2 | 27 | <i>AOC3</i>     |
| module2 | 25 | <i>CD48</i>     |
| module2 | 27 | <i>P3H4</i>     |
| module2 | 27 | <i>GIP</i>      |

|         |    |                |
|---------|----|----------------|
| module2 | 27 | <i>KRT15</i>   |
| module2 | 27 | <i>HSD17B1</i> |
| module2 | 27 | <i>HOXB13</i>  |
| module2 | 22 | <i>IL1B</i>    |
| module2 | 26 | <i>TSHB</i>    |
| module2 | 27 | <i>CNTNAP1</i> |
| module2 | 26 | <i>AMPD1</i>   |
| module2 | 27 | <i>KRT17</i>   |
| module2 | 26 | <i>NGF</i>     |
| module2 | 25 | <i>NHLH1</i>   |
| module2 | 25 | <i>CRABP2</i>  |
| module2 | 27 | <i>IGFBP4</i>  |
| module2 | 4  | <i>SLC7A11</i> |
| module2 | 27 | <i>KRT20</i>   |
| module2 | 4  | <i>SGCB</i>    |
| module2 | 27 | <i>PNMT</i>    |
| module2 | 10 | <i>ACAN</i>    |
| module2 | 4  | <i>CNGA1</i>   |
| module2 | 25 | <i>RAB25</i>   |
| module2 | 26 | <i>PGC</i>     |
| module2 | 1  | <i>OTC</i>     |
| module2 | 27 | <i>KRT12</i>   |
| module2 | 27 | <i>HOXB1</i>   |
| module2 | 25 | <i>ZBTB7B</i>  |
| module2 | 25 | <i>CHRNA2</i>  |
| module2 | 4  | <i>GABRA2</i>  |
| module2 | 15 | <i>RIMBP2</i>  |
| module2 | 27 | <i>HOXB7</i>   |
| module2 | 27 | <i>HOXB5</i>   |
| module2 | 10 | <i>RLBP1</i>   |
| module2 | 25 | <i>S100A13</i> |
| module2 | 26 | <i>TREM2</i>   |
| module2 | 27 | <i>PTRF</i>    |
| module2 | 11 | <i>CDH15</i>   |
| module2 | 25 | <i>PLEKHO1</i> |
| module2 | 27 | <i>PRR15L</i>  |
| module2 | 27 | <i>CACNB1</i>  |
| module2 | 27 | <i>PPP1R1B</i> |
| module2 | 27 | <i>KRT23</i>   |
| module2 | 25 | <i>OTUD7B</i>  |
| module2 | 27 | <i>WNK4</i>    |
| module2 | 10 | <i>HAPLN3</i>  |
| module2 | 25 | <i>S100A11</i> |
| module2 | 22 | <i>ANXA4</i>   |

|         |    |                 |
|---------|----|-----------------|
| module2 | 27 | <i>CCR7</i>     |
| module2 | 27 | <i>KLHL11</i>   |
| module2 | 25 | <i>ETV3</i>     |
| module2 | 11 | <i>CYBA</i>     |
| module2 | 1  | <i>CYBB</i>     |
| module2 | 25 | <i>S100A9</i>   |
| module2 | 27 | <i>SKAP1</i>    |
| module2 | 1  | <i>RPGR</i>     |
| module2 | 25 | <i>MTMR11</i>   |
| module2 | 25 | <i>SH2D2A</i>   |
| module2 | 27 | <i>IKZF3</i>    |
| module2 | 1  | <i>MED14</i>    |
| module2 | 27 | <i>HOXB3</i>    |
| module2 | 27 | <i>PLXDC1</i>   |
| module2 | 26 | <i>TSPAN2</i>   |
| module2 | 27 | <i>ORMDL3</i>   |
| module2 | 26 | <i>ATP2B4</i>   |
| module2 | 25 | <i>CD244</i>    |
| module2 | 15 | <i>SLC15A4</i>  |
| module2 | 27 | <i>TBX21</i>    |
| module2 | 27 | <i>PGAP3</i>    |
| module2 | 25 | <i>S100A6</i>   |
| module2 | 27 | <i>OSBPL7</i>   |
| module2 | 15 | <i>GLT1D1</i>   |
| module2 | 26 | <i>BTG2</i>     |
| module2 | 4  | <i>TXK</i>      |
| module2 | 1  | <i>TSPAN7</i>   |
| module2 | 25 | <i>KCNN3</i>    |
| module2 | 27 | <i>KRT14</i>    |
| module2 | 27 | <i>KRT19</i>    |
| module2 | 27 | <i>CSF3</i>     |
| module2 | 25 | <i>S100A1</i>   |
| module2 | 25 | <i>S100A4</i>   |
| module2 | 15 | <i>MMP17</i>    |
| module2 | 25 | <i>LY9</i>      |
| module2 | 10 | <i>NTRK3</i>    |
| module2 | 25 | <i>CRNN</i>     |
| module2 | 27 | <i>NR1D1</i>    |
| module2 | 27 | <i>ABI3</i>     |
| module3 | 27 | <i>FBXO47</i>   |
| module3 | 27 | <i>AARSD1</i>   |
| module3 | 27 | <i>PHOSPHO1</i> |
| module3 | 22 | <i>NT5DC4</i>   |
| module3 | 10 | <i>KIF7</i>     |

|         |    |                 |
|---------|----|-----------------|
| module3 | 4  | <i>NFXL1</i>    |
| module3 | 27 | <i>PLEKHH3</i>  |
| module3 | 25 | <i>SHE</i>      |
| module3 | 27 | <i>SRCIN1</i>   |
| module3 | 25 | <i>KIRREL</i>   |
| module3 | 27 | <i>PCGF2</i>    |
| module3 | 11 | <i>SPG7</i>     |
| module3 | 4  | <i>ATP10D</i>   |
| module3 | 26 | <i>ANKS1A</i>   |
| module3 | 27 | <i>FBXL20</i>   |
| module3 | 27 | <i>NT5C3B</i>   |
| module3 | 27 | <i>RUNDC1</i>   |
| module3 | 1  | <i>BCOR</i>     |
| module3 | 27 | <i>MLLT6</i>    |
| module3 | 27 | <i>STAT5B</i>   |
| module3 | 27 | <i>ERBB2</i>    |
| module3 | 27 | <i>SOCS7</i>    |
| module4 | 27 | <i>MROH8</i>    |
| module4 | 10 | <i>AGBL1</i>    |
| module4 | 25 | <i>ETV3L</i>    |
| module4 | 4  | <i>RAB33B</i>   |
| module4 | 25 | <i>RAB2B</i>    |
| module4 | 11 | <i>CTU2</i>     |
| module4 | 11 | <i>GALNS</i>    |
| module4 | 27 | <i>VWA5A</i>    |
| module4 | 1  | <i>DYNLT3</i>   |
| module4 | 26 | <i>PPARD</i>    |
| module4 | 26 | <i>UHRF1BP1</i> |
| module4 | 1  | <i>ATP6AP2</i>  |
| module4 | 4  | <i>FRYL</i>     |
| module4 | 26 | <i>SIKE1</i>    |
| module4 | 4  | <i>USP46</i>    |
| module4 | 26 | <i>NRAS</i>     |
| module4 | 4  | <i>ELF2</i>     |
| module4 | 27 | <i>ETV4</i>     |
| module5 | 11 | <i>PABPN1L</i>  |
| module5 | 25 | <i>VANGL2</i>   |
| module5 | 27 | <i>PTGES3L</i>  |
| module5 | 10 | <i>DET1</i>     |
| module5 | 25 | <i>MEX3A</i>    |
| module5 | 4  | <i>SCFD2</i>    |
| module5 | 26 | <i>TOMM6</i>    |
| module5 | 10 | <i>MRPL46</i>   |
| module5 | 15 | <i>AACS</i>     |

|         |    |                 |
|---------|----|-----------------|
| module5 | 11 | <i>ACSF3</i>    |
| module5 | 10 | <i>AEN</i>      |
| module5 | 25 | <i>RRNAD1</i>   |
| module5 | 26 | <i>FANCE</i>    |
| module5 | 25 | <i>PYGO2</i>    |
| module5 | 27 | <i>HSPB9</i>    |
| module5 | 27 | <i>IGF2BP1</i>  |
| module5 | 22 | <i>CKAP2L</i>   |
| module5 | 25 | <i>BGLAP</i>    |
| module5 | 15 | <i>ULK1</i>     |
| module5 | 25 | <i>NTRK1</i>    |
| module5 | 27 | <i>PSMC3IP</i>  |
| module5 | 27 | <i>TCAP</i>     |
| module5 | 26 | <i>BCAS2</i>    |
| module5 | 10 | <i>KLHL25</i>   |
| module5 | 10 | <i>FANCI</i>    |
| module5 | 26 | <i>APOBEC2</i>  |
| module5 | 26 | <i>BYSL</i>     |
| module5 | 27 | <i>TUBG1</i>    |
| module5 | 27 | <i>MRPL45</i>   |
| module5 | 26 | <i>PRICKLE4</i> |
| module5 | 27 | <i>GRB7</i>     |
| module5 | 26 | <i>ZNF76</i>    |
| module5 | 11 | <i>MVD</i>      |
| module5 | 26 | <i>NFYA</i>     |
| module5 | 26 | <i>TAF11</i>    |
| module5 | 27 | <i>RPL23</i>    |
| module5 | 27 | <i>STARD3</i>   |
| module5 | 27 | <i>RARA</i>     |
| module5 | 27 | <i>SP2</i>      |
| module5 | 25 | <i>ARHGEF11</i> |
| module5 | 25 | <i>CHTOP</i>    |
| module5 | 25 | <i>FLAD1</i>    |
| module5 | 25 | <i>MEF2D</i>    |
| module5 | 27 | <i>SMARCE1</i>  |
| module5 | 27 | <i>WIPF2</i>    |
| module5 | 25 | <i>CCT3</i>     |
| module5 | 4  | <i>COMMD8</i>   |
| module5 | 27 | <i>CASC3</i>    |
| module5 | 26 | <i>LEMD2</i>    |
| module5 | 25 | <i>MRPL24</i>   |
| module5 | 26 | <i>RPS10</i>    |
| module5 | 26 | <i>RPL10A</i>   |
| module5 | 25 | <i>ILF2</i>     |

|         |    |                 |
|---------|----|-----------------|
| module5 | 27 | <i>RPL19</i>    |
| module5 | 27 | <i>CBX1</i>     |
| module5 | 27 | <i>ATP5G1</i>   |
| module5 | 26 | <i>SNRPC</i>    |
| module5 | 27 | <i>PSMB3</i>    |
| module5 | 25 | <i>ADAR</i>     |
| module5 | 25 | <i>PMVK</i>     |
| module5 | 27 | <i>EIF1</i>     |
| module5 | 25 | <i>VPS45</i>    |
| module5 | 26 | <i>CSDE1</i>    |
| module5 | 27 | <i>PSMD3</i>    |
| module5 | 25 | <i>PRCC</i>     |
| module5 | 27 | <i>ATP6V0A1</i> |
| module5 | 25 | <i>COPA</i>     |
| module5 | 27 | <i>ACLY</i>     |
| module5 | 25 | <i>PBXIP1</i>   |
| module5 | 25 | <i>GPATCH4</i>  |
| module5 | 25 | <i>NCSTN</i>    |
| module5 | 25 | <i>ANP32E</i>   |
| module5 | 27 | <i>NFE2L1</i>   |
| module5 | 27 | <i>PHB</i>      |
| module5 | 26 | <i>NUDT3</i>    |
| module5 | 26 | <i>MED20</i>    |
| module5 | 27 | <i>MSL1</i>     |
| module5 | 27 | <i>BECN1</i>    |
| module5 | 27 | <i>NPEPPS</i>   |
| module5 | 25 | <i>SMG5</i>     |
| module5 | 27 | <i>EZH1</i>     |
| module5 | 26 | <i>OARD1</i>    |
| module5 | 27 | <i>MED1</i>     |
| module5 | 26 | <i>TRIM33</i>   |
| module5 | 27 | <i>MRPL10</i>   |
| module5 | 27 | <i>UBE2Z</i>    |
| module5 | 27 | <i>LASP1</i>    |
| module5 | 27 | <i>KRT10</i>    |
| module5 | 1  | <i>USP9X</i>    |
| module5 | 25 | <i>NAXE</i>     |
| module5 | 27 | <i>FAM134C</i>  |
| module5 | 15 | <i>EP400</i>    |
| module5 | 10 | <i>MRPS11</i>   |
| module5 | 25 | <i>UBE2Q1</i>   |
| module5 | 27 | <i>PIP4K2B</i>  |
| module5 | 26 | <i>TFEB</i>     |
| module5 | 25 | <i>INTS3</i>    |



|         |    |                 |
|---------|----|-----------------|
| module5 | 10 | <i>POLG</i>     |
| module5 | 27 | <i>CNP</i>      |
| module5 | 27 | <i>DNAJC7</i>   |
| module5 | 27 | <i>MLX</i>      |
| module5 | 11 | <i>ANKRD11</i>  |
| module5 | 10 | <i>AKAP13</i>   |
| module5 | 27 | <i>SNF8</i>     |
| module5 | 25 | <i>LAMTOR2</i>  |
| module5 | 4  | <i>FIP1L1</i>   |
| module5 | 4  | <i>NAA15</i>    |
| module5 | 27 | <i>SNX11</i>    |
| module5 | 25 | <i>SNAPIN</i>   |
| module5 | 27 | <i>NKIRAS2</i>  |
| module5 | 1  | <i>MID1IP1</i>  |
| module5 | 11 | <i>TRAPPC2L</i> |
| module5 | 27 | <i>COA3</i>     |
| module5 | 4  | <i>OCIAD1</i>   |
| module5 | 4  | <i>SLAIN2</i>   |
| module5 | 11 | <i>BANP</i>     |
| module5 | 27 | <i>CISD3</i>    |
| module5 | 27 | <i>MIEN1</i>    |
| module5 | 26 | <i>TAF8</i>     |
| module5 | 11 | <i>ZC3H18</i>   |
| module5 | 25 | <i>SHC1</i>     |
| module5 | 25 | <i>SMAD4</i>    |
| module5 | 25 | <i>CKS1B</i>    |
| module5 | 27 | <i>RPL27</i>    |
| module5 | 27 | <i>TOP2A</i>    |
| module5 | 27 | <i>DAD1</i>     |
| module5 | 11 | <i>APRT</i>     |
| module5 | 26 | <i>CCND3</i>    |
| module5 | 11 | <i>PIEZO1</i>   |
| module5 | 26 | <i>HMGAI</i>    |
| module5 | 25 | <i>SF3B4</i>    |
| module5 | 25 | <i>HDGF</i>     |
| module5 | 27 | <i>CALCOCO2</i> |
| module5 | 27 | <i>KAT2A</i>    |
| module5 | 15 | <i>RAN</i>      |
| module5 | 27 | <i>JUP</i>      |
| module5 | 25 | <i>IL6R</i>     |
| module5 | 27 | <i>CDC6</i>     |
| module5 | 27 | <i>PSME3</i>    |
| module5 | 22 | <i>SLC20A1</i>  |
| module5 | 27 | <i>KPNB1</i>    |

|         |    |                 |
|---------|----|-----------------|
| module5 | 26 | <i>BAK1</i>     |
| module5 | 27 | <i>STAT3</i>    |
| module5 | 4  | <i>DCUN1D4</i>  |
| module5 | 27 | <i>DHX8</i>     |
| module5 | 15 | <i>SFSWAP</i>   |
| module5 | 27 | <i>VPS25</i>    |
| module5 | 25 | <i>UBQLN4</i>   |
| module5 | 27 | <i>RAB5C</i>    |
| module5 | 11 | <i>CDT1</i>     |
| module5 | 15 | <i>PUS1</i>     |
| module5 | 27 | <i>CDK12</i>    |
| module6 | 27 | <i>ZNF385C</i>  |
| module6 | 27 | <i>SP6</i>      |
| module6 | 1  | <i>LANCL3</i>   |
| module6 | 27 | <i>CNTD1</i>    |
| module6 | 27 | <i>PNPO</i>     |
| module6 | 27 | <i>DHX58</i>    |
| module6 | 10 | <i>PEX11A</i>   |
| module6 | 27 | <i>GHDC</i>     |
| module6 | 10 | <i>ABHD2</i>    |
| module6 | 27 | <i>NAGLU</i>    |
| module6 | 26 | <i>ITPR3</i>    |
| module6 | 26 | <i>DEF6</i>     |
| module6 | 27 | <i>CWC25</i>    |
| module6 | 11 | <i>RNF166</i>   |
| module6 | 27 | <i>CDK5RAP3</i> |
| module6 | 25 | <i>GLMP</i>     |
| module6 | 27 | <i>SCRN2</i>    |
| module6 | 4  | <i>SETD7</i>    |
| module6 | 27 | <i>IFI35</i>    |
| module6 | 4  | <i>MGST2</i>    |
| module6 | 4  | <i>MAML3</i>    |
| module6 | 27 | <i>ZNF652</i>   |
