# Supplementary material for: Discovery and characterization of functional modules associated with body weight in broilers
Source: PubMed Central journal article supplement (PMC6591351; doi:10.1038/s41598-019-45520-5), 2019-06-24
Supplement: 41598_2019_45520_MOESM4_ESM.pdf [file 41598_2019_45520_MOESM4_ESM.pdf]

# Discovery and characterization of functional modules associated with body weight in broilers

Eirini Tarsani<sup>1\*</sup>, Andreas Kranis<sup>2,3</sup>, Gerasimos Maniatis<sup>2</sup>, Santiago Avendano<sup>2</sup>, Ariadne L. Hager-Theodorides<sup>1</sup>, Antonios Kominakis<sup>1</sup>

<sup>1</sup>Department of Animal Science and Aquaculture, Agricultural University of Athens, Iera Odos 75, 11855, Athens, Greece

<sup>2</sup>Aviagen Ltd., Newbridge, Midlothian EH28 8SZ, UK

<sup>3</sup> The Roslin Institute, University of Edinburgh, EH25 9RG, Midlothian, United Kingdom

\*corresponding author: [etarsani@aua.gr](mailto:etarsani@aua.gr)

Table S4: Significantly enriched GO biological processes (BPs) per each module. GO BP terms in bold are associated with development. None enriched GO BP was found for module\_6.

| <b>Module_ID</b> | <b>GO_ID</b>      | <b>GO BP term</b>                               | <b>Considered relevant to BW as a subclass or child term of the developmental process or growth parent term</b> | <b>P-value</b> | <b>Number of genes</b> | <b>Associated genes found</b>                                                                           |
|------------------|-------------------|-------------------------------------------------|-----------------------------------------------------------------------------------------------------------------|----------------|------------------------|---------------------------------------------------------------------------------------------------------|
| module_2         | <b>GO:0048704</b> | <b>embryonic skeletal system morphogenesis</b>  | yes                                                                                                             | 0.00000000483  | 9                      | <i>HOXB3, MDFI, HOXB4, HOXB1, HOXB2, HOXB7, HOXB8, HOXB5, HOXB6</i>                                     |
| module_2         | <b>GO:0009952</b> | <b>anterior/posterior pattern specification</b> | yes                                                                                                             | 0.000000125    | 10                     | <i>HOXB3, HOXB4, HOXB1, HOXB2, BTG2, HOXB7, HOXB8, HOXB5, HOXB6, HOXB9</i>                              |
| module_2         | <b>GO:0007417</b> | <b>central nervous system development</b>       | yes                                                                                                             | 0.001          | 7                      | <i>HAPLN2, NES, HAPLN3, GABRA4, ACAN, BCAN, NHLH1</i>                                                   |
| module_2         | <b>GO:0007275</b> | <b>multicellular organism development</b>       | yes                                                                                                             | 0.003          | 14                     | <i>CSF3, ZBTB7B, ZARI, TBX21, HOXB3, FZD10, TCP11, HOXB1, HOXB2, HOXB7, HOXB8, MEOX1, PIWIL1, SPDEF</i> |
| module_2         | <b>GO:0030851</b> | <b>granulocyte differentiation</b>              | yes                                                                                                             | 0.005          | 3                      | <i>CSF3, ZFPM1, CBFA2T3</i>                                                                             |
| module_2         | GO:0042340        | keratan sulfate catabolic process               | no                                                                                                              | 0.006          | 3                      | <i>FMOD, ACAN, PRELP</i>                                                                                |

|          |                   |                                                                  |     |       |    |                                                                                                                                                             |
|----------|-------------------|------------------------------------------------------------------|-----|-------|----|-------------------------------------------------------------------------------------------------------------------------------------------------------------|
| module_2 | GO:0006811        | ion transport                                                    | no  | 0.099 | 6  | <i>CYBB, GABRA2, WNK4, GABRB1, CHRN2, SLC15A4</i>                                                                                                           |
| module_2 | <b>GO:0008544</b> | <b>epidermis development</b>                                     | yes | 0.011 | 5  | <i>KRT17, KRT15, CRABP2, KRT14, HOXB13</i>                                                                                                                  |
| module_2 | <b>GO:0001501</b> | <b>skeletal system development</b>                               | yes | 0.013 | 6  | <i>HAPLN2, HAPLN3, ACAN, BCAN, IGFBP4, PRELP</i>                                                                                                            |
| module_2 | GO:0007169        | transmembrane receptor protein tyrosine kinase signaling pathway | no  | 0.017 | 5  | <i>NTRK3, TXK, TEC, NGF, INSR</i>                                                                                                                           |
| module_2 | GO:0007155        | cell adhesion                                                    | no  | 0.020 | 11 | <i>HAPLN2, CDH15, SRPX, HAPLN3, ACAN, BCAN, CNTNAP1, MFGE8, SLAMF1, AOC3, PCDH18</i>                                                                        |
| module_2 | <b>GO:0021570</b> | <b>rhombomere 4 development</b>                                  | yes | 0.020 | 2  | <i>HOXB1, HOXB2</i>                                                                                                                                         |
| module_2 | GO:0007214        | gamma-aminobutyric acid signaling pathway                        | no  | 0.021 | 3  | <i>GABRG1, GABRA2, GABRA4</i>                                                                                                                               |
| module_2 | GO:0008306        | associative learning                                             | no  | 0.025 | 3  | <i>BTG2, NEUROD2, CHRN2</i>                                                                                                                                 |
| module_2 | GO:0007165        | signal transduction                                              | no  | 0.029 | 20 | <i>S100A6, CD244, GIP, STX2, GABRB1, CRABP2, S100A9, S100A11, ARHGAP23, ANXA4, SLAMF1, CD48, SH2D2A, KRT17, PPP1R1B, IL1B, CHRN2, CNTNAP1, FRS3, IGFBP4</i> |
| module_2 | GO:1904044        | response to aldosterone                                          | no  | 0.030 | 2  | <i>CYBA, CYBB</i>                                                                                                                                           |
| module_2 | GO:0070634        | transepithelial ammonium transport                               | no  | 0.030 | 2  | <i>RHCG, RHBG</i>                                                                                                                                           |

|          |                   |                                                             |     |           |    |                                                                                                                |
|----------|-------------------|-------------------------------------------------------------|-----|-----------|----|----------------------------------------------------------------------------------------------------------------|
| module_2 | GO:1904845        | cellular response to L-glutamine                            | no  | 0.030     | 2  | <i>CYBA, CYBB</i>                                                                                              |
| module_2 | GO:0018146        | keratan sulfate biosynthetic process                        | no  | 0.033     | 3  | <i>FMOD, ACAN, PRELP</i>                                                                                       |
| module_2 | GO:0006954        | inflammatory response                                       | no  | 0.042     | 9  | <i>IL17C, CYBA, CYBB, CCR7, TSPAN2, S100A9, IL1B, IGFBP4, AOC3</i>                                             |
| module_2 | <b>GO:0030154</b> | <b>cell differentiation</b>                                 | yes | 0.049     | 10 | <i>ZBTB7B, SH2D2A, TCP11, NR1D1, STX2, SPDEF, TXK, NHLH1, TEC, ETV3</i>                                        |
|          |                   |                                                             |     |           |    |                                                                                                                |
| module_3 | GO:0016311        | dephosphorylation                                           | no  | 0.005     | 3  | <i>NT5C3B, PHOSPHO1, NT5DC4</i>                                                                                |
| module_3 | GO:0071364        | cellular response to epidermal growth factor stimulus       | no  | 0.039     | 2  | <i>ERBB2, STAT5B</i>                                                                                           |
|          |                   |                                                             |     |           |    |                                                                                                                |
| module_4 | <b>GO:0030154</b> | <b>cell differentiation</b>                                 | yes | 0.005     | 4  | <i>PPARD, ELF2, ETV3L, ETV4</i>                                                                                |
| module_4 | GO:0007264        | small GTPase mediated signal transduction                   | no  | 0.015     | 3  | <i>NRAS, RAB2B, RAB33B</i>                                                                                     |
| module_4 | GO:0006357        | regulation of transcription from RNA polymerase II promoter | no  | 0.044     | 3  | <i>PPARD, ELF2, ETV3L</i>                                                                                      |
|          |                   |                                                             |     |           |    |                                                                                                                |
| module_5 | GO:0045893        | positive regulation of transcription, DNA-templated         | no  | 0.0000287 | 16 | <i>CKS1B, RAN, TAF8, PHB, SMAD4, TFEB, NAA15, BANP, NFYA, HMGAI, STAT3, ARHGEF11, ILF2, RARA, NFE2L1, MED1</i> |

|          |            |                                                                     |    |          |   |                                                                   |
|----------|------------|---------------------------------------------------------------------|----|----------|---|-------------------------------------------------------------------|
| module_5 | GO:0045471 | response to ethanol                                                 | no | 0.000256 | 7 | <i>BAK1, BGLAP, NTRK1, RARA, RPL10A, AACs, STAT3</i>              |
| module_5 | GO:0000184 | nuclear-transcribed mRNA catabolic process, nonsense-mediated decay | no | 0.000502 | 7 | <i>RPL19, RPL23, SMG5, RPL27, RPS10, CASC3, RPL10A</i>            |
| module_5 | GO:0070102 | interleukin-6-mediated signaling pathway                            | no | 0.002    | 3 | <i>SMAD4, IL6R, STAT3</i>                                         |
| module_5 | GO:0046902 | regulation of mitochondrial membrane permeability                   | no | 0.003    | 3 | <i>BAK1, CNP, STAT3</i>                                           |
| module_5 | GO:0006412 | translation                                                         | no | 0.006    | 8 | <i>MRPL24, MRPL10, RPL19, RPL23, MRPS11, RPL27, RPS10, RPL10A</i> |
| module_5 | GO:0070125 | mitochondrial translational elongation                              | no | 0.006    | 5 | <i>MRPL24, MRPL10, MRPS11, MRPL45, MRPL46</i>                     |
| module_5 | GO:0070126 | mitochondrial translational termination                             | no | 0.006    | 5 | <i>MRPL24, MRPL10, MRPS11, MRPL45, MRPL46</i>                     |
| module_5 | GO:0006413 | translational initiation                                            | no | 0.006    | 6 | <i>RPL19, RPL23, RPL27, RPS10, EIF1, RPL10A</i>                   |
| module_5 | GO:0006614 | SRP-dependent cotranslational protein targeting to membrane         | no | 0.008    | 5 | <i>RPL19, RPL23, RPL27, RPS10, RPL10A</i>                         |
| module_5 | GO:0006606 | protein import into nucleus                                         | no | 0.013    | 4 | <i>RAN, KPMB1, STAT3, ADAR</i>                                    |
| module_5 | GO:0019083 | viral transcription                                                 | no | 0.015    | 5 | <i>RPL19, RPL23, RPL27, RPS10, RPL10A</i>                         |

|          |                   |                                                                                                                                    |     |       |   |                                                                 |
|----------|-------------------|------------------------------------------------------------------------------------------------------------------------------------|-----|-------|---|-----------------------------------------------------------------|
| module_5 | GO:0045737        | positive regulation of cyclin-dependent protein serine/threonine kinase activity                                                   | no  | 0.017 | 3 | <i>CKS1B, CDC6, CCND3</i>                                       |
| module_5 | GO:0006397        | mRNA processing                                                                                                                    | no  | 0.018 | 6 | <i>APOBEC2, BCAS2, CDK12, CASC3, SF3B4, ADAR</i>                |
| module_5 | GO:0008285        | negative regulation of cell proliferation                                                                                          | no  | 0.019 | 9 | <i>CDC6, BAK1, BECN1, NTRK1, PHB, SMAD4, RARA, HMGA1, STAT3</i> |
| module_5 | GO:0019287        | isopentenyl diphosphate biosynthetic process, mevalonate pathway                                                                   | no  | 0.025 | 2 | <i>MVD, PMVK</i>                                                |
| module_5 | GO:0006914        | autophagy                                                                                                                          | no  | 0.026 | 5 | <i>BECN1, SNF8, TFEB, UBQLN4, VPS25</i>                         |
| module_5 | GO:0016236        | macroautophagy                                                                                                                     | no  | 0.026 | 4 | <i>TOMM6, BECN1, LAMTOR2, ULK1</i>                              |
| module_5 | <b>GO:0035264</b> | <b>multicellular organism growth</b>                                                                                               | yes | 0.030 | 4 | <i>KAT2A, SP2, ANKRD11, RARA</i>                                |
| module_5 | GO:0043328        | protein targeting to vacuole involved in ubiquitin-dependent protein catabolic process via the multivesicular body sorting pathway | no  | 0.033 | 2 | <i>SNF8, VPS25</i>                                              |
| module_5 | GO:0006364        | rRNA processing                                                                                                                    | no  | 0.035 | 6 | <i>RPL19, RPL23, BYSL, RPL27, RPS10, RPL10A</i>                 |
| module_5 | GO:0000398        | mRNA splicing, via spliceosome                                                                                                     | no  | 0.039 | 6 | <i>BCAS2, DHX8, FIP1L1, CASC3, SNRPC, SF3B4</i>                 |
| module_5 | GO:0006695        | cholesterol biosynthetic process                                                                                                   | no  | 0.040 | 3 | <i>MVD, ACLY, PMVK</i>                                          |

|          |                   |                                  |     |       |   |                                                         |
|----------|-------------------|----------------------------------|-----|-------|---|---------------------------------------------------------|
| module_5 | GO:0016032        | viral process                    | no  | 0.041 | 7 | <i>KAT2A, RAN, PSMB3, CALCOCO2, SNAPIN, SHC1, STAT3</i> |
| module_5 | GO:0042493        | response to drug                 | no  | 0.043 | 7 | <i>BAK1, BGLAP, BECN1, NTRK1, DAD1, AACS, STAT3</i>     |
| module_5 | GO:0010508        | positive regulation of autophagy | no  | 0.044 | 3 | <i>BECN1, ULK1, TFEB</i>                                |
| module_5 | <b>GO:0060348</b> | <b>bone development</b>          | yes | 0.048 | 3 | <i>BGLAP, ANKRD11, AKAP13</i>                           |
| module_5 | GO:0006886        | intracellular protein transport  | no  | 0.049 | 6 | <i>COPA, RAN, VPS45, SNAPIN, KPNB1, SNX11</i>           |
| module_5 | GO:0000395        | mRNA 5'-splice site recognition  | no  | 0.049 | 2 | <i>SFSWAP, SNRPC</i>                                    |
